# Supplementary material for: Integrated analysis identifies microRNA-195 as a suppressor of Hippo-YAP pathway in colorectal cancer
Source: PubMed Central journal article supplement (PMC5372308; doi:10.1186/s13045-017-0445-8), 2017-03-29

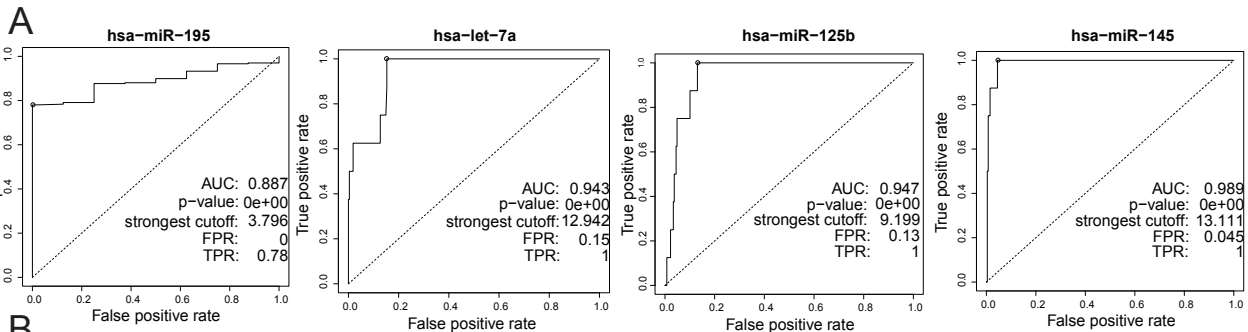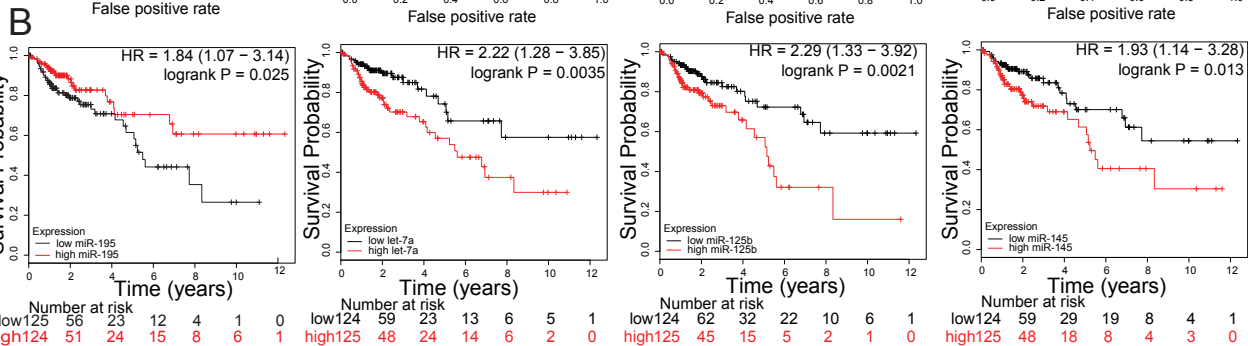

Supplement: 13045_2017_445_MOESM10_ESM.pdf [file 13045_2017_445_MOESM10_ESM.pdf]
