# Supplementary material for: Integrated analysis identifies microRNA-195 as a suppressor of Hippo-YAP pathway in colorectal cancer
Source: J Hematol Oncol. 2017 Mar 29;10:79. doi: 10.1186/s13045-017-0445-8 (PMC5372308; doi:10.1186/s13045-017-0445-8)
Supplement: Supplementary file 1 — Table S1. The full-detailed search strategy and searching terms through PubMed, GEO, and Array Express databases. (XLS 26 kb) [file 13045_2017_445_MOESM1_ESM.xls]

## Sheet: Table S1
Search NO.	Search criterion of Medline (via PubMed, from inception to September 2015)	Items found
#1	((colorectal neoplasms [mesh] OR Colorectal Neoplasm* [tw] OR Colorectal Tumor* [tw] OR Colorectal Carcinoma* [tw] OR Colorectal Cancer* [tw] OR colonic neoplasms [mesh] OR Colonic Neoplasm* [tw] OR Colon Neoplasm* [tw] OR Colon Cancer* [tw] OR Colonic Cancer* [tw] OR rectal neoplasms [mesh] OR Rectal Neoplasm* [tw] OR Rectum Neoplasm* [tw] OR Rectal Tumor* [tw] OR Rectum Cancers [tw] OR Rectal C…	201077
#2	(profile[tiab] or profiles[tiab] or profiling[tiab] or pattern[tiab])	1119676
#3	((((((("micrornas"[MeSH Terms] OR microRNA[Text Word]))) OR ((((((((((((MicroRNA[tiab]) OR miRNAs[tiab]) OR Micro RNA[tiab]) OR miRNA[tiab]) OR Primary MicroRNA[tiab]) OR Primary miRNA[tiab]) OR pri-miRNA[tiab]) OR pri miRNA[tiab]) OR stRNA[tiab]) OR Small Temporal RNA[tiab]) OR pre-miRNA[tiab]) OR pre miRNA[tiab])) OR ((((((RNA[tiab] AND Micro[tiab])) OR (MicroRNA[tiab] AND Primary[tiab])) OR (m…	57335
#4	#1 AND #2 AND #3	366
	Search criterion of GEO Databases
#1	(colorectal[All Fields] OR ("colon"[MeSH Terms] OR "Colon"[Organism] OR colon[All Fields]) OR rectal[All Fields]) AND (("neoplasms"[MeSH Terms] OR cancer[All Fields]) OR ("neoplasms"[MeSH Terms] OR tumor[All Fields]) OR ("adenocarcinoma"[MeSH Terms] OR adenocarcinoma[All Fields]) OR ("neoplasms"[MeSH Terms] OR neoplasia[All Fields])))	38539
#2	((("micrornas"[MeSH Terms] OR mirna[All Fields]) OR ("micrornas"[MeSH Terms] OR microrna[All Fields]) OR ("micrornas"[MeSH Terms] OR mirnas[All Fields]) OR ("micrornas"[MeSH Terms] OR micrornas[All Fields]))	43203
#3	(profile[All Fields] OR profiles[All Fields] OR profiling[All Fields] OR pattern[All Fields])	90048
#4	"Homo sapiens"[porgn]	1182376
#5	#1 AND #2 AND #3 AND #4	477
	Search criterion of ArrayExpress Databases
#1	((mirna OR microrna or mirnas or micrornas) AND (colorectal OR colon OR rectal) AND (cancer OR tumor OR adenocarcinoma OR neoplasia))	17
Table S1. The full detailed search strategy and searching terms through the PubMed, GEO and Array Express databases
