# Supplementary material for: Integrated analysis identifies microRNA-195 as a suppressor of Hippo-YAP pathway in colorectal cancer
Source: J Hematol Oncol. 2017 Mar 29;10:79. doi: 10.1186/s13045-017-0445-8 (PMC5372308; doi:10.1186/s13045-017-0445-8)
Supplement: Supplementary file 11 — Table S8. Seventy-one consensus target genes were summarized by 4 different target prediction algorithms. (XLS 150 kb) [file 13045_2017_445_MOESM11_ESM.xls]

## Sheet: Table S8. 71 consensus targets
Table S8. Seventy-one consensus target genes were summarized by 4 different target prediction algorithms: TargetScan v7.1, miRDB , DIANA-TarBase v7.0, PicTar.
DIANA-TarBase	miRDB	PicTar	TargetScan	Consensus offical gene symbol	Consensus Entrez gene ID(Pubmed)
ZW10	STRADB	nr4a3	ARL2	WNT3A	51
ZSWIM6	ZFHX4	Dach1	CCNE1	NAV1	92
ZNRF3	SYNJ1	LAMC1	SPRED1	CDC25A	396
ZNFX1	IPO7	slc2a14	PLSCR4	N4BP1	595
ZNF827	CDCA4	SFRS16	DNAJB4	SUPT16H	898
ZNF697	NUP50	ptch1	WNT3A	ZHX1	905
ZNF627	PAPPA	zer1	TNFSF13B	ATP13A3	993
ZNF622	LUZP1	C16orf7	ZBTB34	MIPOL1	1399
ZNF580	SLC13A3	KRTAP4-4	LSM11	TBPL1	2145
ZNF532	UNC80	wipi2	CYB561D1	SNX16	2247
ZNF43	HSPA4L	SLC36A1	ANO3	CCNT2	2683
ZNF367	MTMR3	CAPN6	FP15737	EZH1	2773
ZNF326	PTPN4	NRP2	TMEM74B	ARHGDIA	3783
ZNF281	PHF19	bcr	PHF19	CCNE1	4092
ZNF264	ZBTB44	pcdha13	WEE1	SPRYD3	5069
ZNF224	RECK	PCDHA10	BCL2L2		5090
ZNF181	N4BP1	PCDHAC2	WNT7A	CD164	5324
ZNF146	VEGFA	PCDHAC1	PTH	STXBP3	5576
ZMYND11	PPM1A	PCDHA2	AQP11	FGF2	5887
ZMPSTE24	ZMAT3	SPSB4	MAMSTR	PLAG1	5930
ZMAT3	RNF144B	cab39	CDCA4	RNF138	6446
ZIC5	SLC9A6	PCDHA11	HTR2A	UBR3	6575
ZHX1	AKT3	Cdk17	APLN	PRKAR2A	6814
ZFYVE20	BTRC	PCDHA12	SNCG	TBP	6908
ZFYVE1	CNOT6L	RUNX1T1	CDC42SE2	CHPT1	7812
ZFR	FAM134A	Pcdha4	CCDC19	KIF23	7832
ZFHX3	CCNE1	PCDHA1	SLC9A6	SOCS6	7846
ZFAND6	USP25	pcdha13	SLC9A8	RSBN1	8434
ZER1	SALL1	PCDHA10	NEK10	PRDM4	8763
ZDHHC23	C1orf21	PCDHAC2	MYB		9053
ZDHHC12	PCMT1	PCDHAC1	DESI1	SLC20A2	9097
ZCRB1	KIF5C	USP2	BTLA	RBBP6	9306
ZCCHC2	CC2D1B	RASL12	KRTAP4-4	ZCCHC2	9493
ZCCHC11	INSR	C12orf76	SPRYD3	SGK1	9519
ZC3HC1	CBX2	tmem87b	ZNF622	TAB3	9529
ZC3H6	EDA	PCDHA5	RBM6	COPS7B	9683
ZC3H11A	WEE1	PCDHA6	OMG	CDCA4	9823
ZBTB5	SHOC2	PCDHA8	SIX6	YAP1	10413
ZBTB47	TLK1	BHLHE41	FGF7	GNAI3	10890
ZBTB46	UBE4B	PCDHA3	TMEM100	PHIP	10908
ZBTB45	MOB3B	Bfar	EMC4	KIF1B	11108
ZBTB39	CYB561A3	plekha1	RAB9B	ACVR2A	11198
ZBTB34	TCAIM	Pcdha4	RASGEF1B	CSDE1	11215
ZBTB33	FASN	PCDHA1	C2orf42	RECK	11244
ZBTB21	RBBP6	RAB10	PURA	USP14	22849
ZBTB14	PAFAH1B1	BMX	SIRT4	PAPPA	22936
YWHAG	C9orf91	PDCD4	KDSR	CCND1	23063
YWHAB	RNF10	OCRL	PTPN3	MAP7	23095
YTHDF1	PTPN3	Nfatc3	CDC37L1	CPEB2	25948
YRDC	MYRIP	Nfatc3	GNAI3	RAB10	28514
YIPF2	C14orf37	Atf7ip2	AKT3	GRAMD3	29035
YES1	DDX3X	DYRK1A	C1QL3	KBTBD2	51444
YAP1	ANO3	DYRK1A	CNOT6L	B4GALT1	54665
XPO7	EZH1	PCDHA7	C1orf21	RNF43	54877
XPO6	ABL2	PCDHA6	ZNF697	AKAP11	54894
XPO1	RASGEF1B	PCDHA8	PAPPA	CPEB3	55023
XPNPEP3	MYT1L	OTUB1	ZBTB16	SMAD7	55038
XKR8	AHCYL2	RNF138	KCNJ2	CDC37L1	55664
XIAP	PISD	RELN	SMPD1	PNPLA6	56994
WTAP	ATG14	SOCS6	CCND1	PBX3	63916
WSB1	C2orf42	SCARF1	AC068987.1	ELL2	64089
WNT9A	SPRED1	ERC2	BTG2	DLL1	64708
WNT3A	ARIH1	Rnf41	TMEM55A	CRKL	65983
WIPI2	TMEM55A	UBE2J1	UBE2V1	BAG5	79572
WIBG	ELL	Casr	RSPO3	BTG2	84926
WEE1	TBL1XR1	AK3L2	AXIN2	TUBA1A	89780
WDSUB1	STOX2	AK3L1	SETD3	KCNN4	89796
WDR82	ASH1L	tmem33	RNF144B	C16orf72	92369
WBP1	SNX16	phf20	GPR63	RAD23B	130507
WAPAL	ETNK1	2017-03-09	SMAD7	WAPAL	132864
VTI1B	CCDC6	col12a1	FAM133B	ELMO2	145282
VTCN1	PHKA1	esrrg	N4BP1	ARMCX2	257397
VTA1	PLEKHA1	BCL9	CACUL1	SPSB4	493913
VPS37C	ZNF622	Crim1	CCND2
VPS36	DPY19L4	esrrg	RPL14
VPS13B	PRKAR2A	kif21a	TFCP2L1
VPS13A	IKBKB	RBM6	KCNN4
VMP1	CCDC19	LOC643778	IPPK
VMA21	RBM6	BMPR1A	DLEU7
VIM	DMTF1	SPRYD3	WIPI2
VHL	SMURF1	taf15	PDK4
VGLL4	GABARAPL1	bcr	AK4
VEZT	RFX3	RANBP3	TGIF2
VEGFA	SMAD7	Akt3	MKNK1
VDAC3	RBPJ	Gpr63	PPAP2A
VCPIP1	SOCS6	WSB1	TLK1
VCP	PLSCR4	kpna3	PCDHA11
VCAM1	MOB4	RANBP3	PTPN4
VAMP7	CYP26B1	SCARF1	ATG9A
UVSSA	KLHL18	KPNA4	KIF23
UTP15	SRPR	pitpna	UNC80
UST	CD47	GNAI3	DGCR2
USP42	CAPZA2	DHDDS	HMGA2
USP31	SCN8A	SYNE1	USP25
USP14	DYNC1I1	CDV3	PCDHAC2
USO1	CASK	GRIN1	MOB4
UQCRH	RAB9B	Trip10	VEGFA
UNG	SLIT2	BAI1	2017-09-02
UNC13A	CLSPN	PSME3	FAM73A
UHRF1BP1	POLR3F	CCNT2	ARL3
UHMK1	ESPN	pam	SYS1
UCKL1	ILDR2	pam	CDK5R1
UBR4	HERC6	BDNF	MAFK
UBR3	SLC12A2	USP15	KIF1B
UBN2	STXBP3	MEX3C	SLC35G1
UBLCP1	FAM110C	PRDM4	GSKIP
UBFD1	HELZ	myb	PEX13
UBE4B	BAG4	PSME3	SHOC2
UBE3C	GSTCD	ttc21b	VAPB
UBE3A	USP42	abhd13	RNF138
UBE2T	RAB11FIP2	COPS2	CAPZA2
UBE2R2	YWHAH	KRTAP11-1	RUNX1T1
UBE2D1	CACUL1	PPP1R12B	CBX4
UBAP2	USP31	ISOC1	SRPR
UBAP1	PNISR	fam122a	KLHL18
UBA6	RASEF	CCND2	PLAG1
U2SURP	ZBTB34	FAM54B	ZMAT3
U2AF2	GPR63	ACVR2A	SLC7A2
TXLNA	FBXW7	KCNN4	TEX19
TWISTNB	LATS1	DYRK1A	RASSF8
TUT1	MAPK8	WWP1	ANXA11
TUSC2	2017-09-02	PCDH9	SH3GL2
TUBA1A	LYZL4	ADRB2	BTAF1
TUBA1A	ZC2HC1A	ARHGDIA	CRKL
TTYH3	GATAD2A	pcmt1	SYNRG
TTPAL	MKX	prpf38a	CLDN12
TTK	KIAA1432	Ly6e	PTPRR
TTC30B	CDK17	EIF2C4	IKBKB
TTC3	FAM133B	AP2A1	CHEK1
TTC17	TRIM66	C1orf9	HSPE1-MOB4
TTBK2	ELMSAN1	Baz2a	RPS6KA3
TSPAN3	KCNN4	SGCD	MYBL1
TSN	SEMA6D	C17orf59	SALL4
TSC22D2	MTHFR	Tle4	ARMC12
TSC22D1	SLC15A4	KBTBD4	FGF2
TRRAP	KCNG4	EGLN2	FASN
TRPS1	CPEB3	mnt	RAB30
TRIM44	GPATCH8	Cbfa2t3	HSPA4L
TRIM37	ARL3	NAA25	PLEKHA5
TRIM35	RAD23B	vat1	MEOX2
TRIM33	WIPI2	CYP26B1	CA8
TRAP1	PLAG1	Map2k3	AMER1
TRAM1	AEBP2	ZHX1	UBE2Q1
TRAF5	ZDHHC21	Slc9a6	UBE4B
TRAF4	ADRB2	CCNT2	FAM179B
TPRG1L	ZDHHC15	PIAS1	IST1
TPH2	PPP1R11	Dnaja2	ACTR2
TP53INP1	TPM2	C3orf23	DYRK1B
TOX4	PTH	HOXD1	CYB561
TOP1	GAREM	ADAMTS5	CCNT2
TOMM20	PAFAH1B2	speG	SYT3
TNRC6C	SNRPB2	lrig1	KIAA0247
TNRC6B	SEH1L	PPM1A	GAREM
TNRC6A	AMOTL1	ITPR1	ZBTB46
TNPO3	ZFYVE20	ZCCHC3	RBMS1
TNPO2	LRP6	KIF16B	POLR3F
TNPO1	FERMT2	ACTR1A	MED26
TNKS2	EPC1	CCNE1	PPM1E
TNKS1BP1	OOEP	NRP2	DLL1
TNK2	SOWAHC	ARHGAP20	UBQLNL
TNFSF9	UBN2	SIPA1L2	SLC2A14
TNFRSF12A	HOXA10	GHR	TBPL1
TNFRSF10B	CDC42SE2	AKAP11	NDP
TNFAIP1	ARHGAP12	ZSWIM3	BTRC
TMX3	AGO4	Rarb	BPIFA1
TMUB1	ZCCHC3	DOLPP1	TMEM161B
TMTC4	TACC1	GRIN1	WDR82
TMTC3	SUMO3	Dach1	NFS1
TMOD3	CAMSAP1	CPSF7	ALOX12
TMEM8A	TAB3	ARMCX2	GADD45G
TMEM87B	CD2AP	pdia6	FBXW7
TMEM59	AXIN2	Rnf111	SEMA6D
TMEM55B	EPB41L4B	Plxna2	EPT1
TMEM55A	CRIM1	MINK1	RNF24
TMEM43	SERBP1	Zfc3h1	SPAG7
TMEM258	IVNS1ABP	Tmem55a	VTI1B
TMEM245	SBNO1	GAN	YWHAH
TMEM214	C20orf112	NAV1	WBP11
TMEM206	PTPRR	ITGA2	TMEM55B
TMEM2	PTPRD	USP14	C3orf27
TMEM199	KIF23	WNT3A	ENTPD7
TMEM189UBE2V1	ARHGAP32	G0s2	GABARAPL1
TMEM183A	CDC37L1	KCTD1	PAFAH1B1
TMEM181	MED26	SYNE1	TFAP2D
TMEM161A	ZHX1	MAP3K3	KIF21A
TMEM159	SIPA1L2	Arl8b	RNF125
TMEM134	SREK1	Adamtsl3	TFRC
TMEM127	RELN	PPM1A	INSR
TMEM123	TNFSF13B	SYNRG	PCMT1
TMEM121	USP9X	KLHL2	TACC1
TMED7	PDK4	wipi2	WNT2B
TMED3	MICAL2	AHCYL2	HELZ
TMED2	KIF21A	SYNE1	RECK
TMED10	RAPH1	TRIM36	RAB9A
TMCC1	PDLIM5	RBBP6	PLA2G15
TMC8	MGAT4A	CHPT1	GABBR1
TMBIM6	CPSF7	tspan5	TRMT112
TM9SF3	BTAF1	TSC22D3	KIAA1328
TM9SF2	TMEM100	GRAMD4	CIDEB
TM7SF2	PEX5	dcun1d4	E2F7
TLN1	CPEB2	FGF2	DCP1A
TLK1	ARHGDIA	dcaf7	MMS19
TLE4	ZNF275	CDX2	HIGD1A
TIMM13	FAM91A1	Fgf7	ALAD
THTPA	SGK1	YAP1	CPEB2
THOC5	SYT4	FGF7P2	SGK1
TGOLN2	MTFR1L	SIAH1	VPS4A
TGIF2	FAM63B	Syt8	SLIT2
TGIF1	SEL1L3	usp25	PCDHA3
TFPI	FGF2	CCNJ	GALNT7
TFG	MEOX2	gorasp2	SNX16
TFCP2	C8orf4	AK3L2	CHAC1
TEX261	BTLA	AK3L1	ZNF449
TENC1	TMEM255A	ABCG4	MIPOL1
TECTA	PEX12	CSDE1	PHACTR2
TCP1	MYO5A	PPP2R5C	GORASP2
TCFL5	TGFBR3	CHRNE	PLRG1
TCF3	PVRL1	CHEK1	AGO4
TCF20	LYRM5	WSB1	TMEM189-UBE2V1
TCF12	TBPL1	ACSL1	STRADB
TBPL1	RAB9A	SNX16	CDK17
TBP	NF1	sh3gl2	BDNF
TBL3	ACSS2	PDIK1L	RFX3
TBL1XR1	YTHDC1	MAP3K4	TMEM189
TBC1D9	KL	EZH1	CARM1
TBC1D25	MAPK9	SNX16	SCN8A
TBC1D20	TRIM35	MACF1	PLD1
TBC1D17	PTPN14	serbp1	CDC14A
TBC1D13	MAP7	LOC644037	ATXN7L3
TATDN2	CLCN4	LOC645691	KIF5A
TAPT1	ACTR2	HNRPA1L-2	FGF18
TAOK2	ZDHHC23	LOC728643	TENM2
TAOK1	RFK	HNRNPA1P2	ZNF609
TAF7	C1QL3	HNRNPA1	LUZP1
TADA2B	YWHAQ	HNRPA1L3	MYLK
TACSTD2	PCDHAC2	Rspo3	TMCC1
TACC1	LRIG2	glud1	CDC27
TAB3	GRM7	DLL4	KIAA1432
TAB2	MLYCD	dedD	ELL
SYMPK	CLOCK	CAMSAP1	DOLPP1
SYAP1	UBE2K	LOC645822	GSTCD
SVIP	ADAMTSL1	USP32	RAB40AL
SVIL	SYPL1	ARFGAP2	ZMYM2
SURF4	FAM122B	KIF1B	IHH
SUPT16H	TK2	SON	HMGA1
SUMO3	C8orf58	LYPLA2P1	GYLTL1B
SUGT1	RASSF8	LYPLA2	PDCD11
SUCLG1	RNF24	GPN1	CCNYL1
SUCLA2	KDSR	Angel1	CD28
STYX	CCNT2	PPP6C	VWC2L
STXBP3	IST1	STXBP3	LITAF
STX16	PLEKHA5	Ptpn3	USP3
STT3A	RSBN1	C9orf150	PPM1D
STRIP1	LCORL	LRP6	CCND3
STK38	ZC3H13	MAP2K4	MTMR11
STK35	ADAMTS3	mtss1	ACVR2B
STK33	DEF8	Tgif2	LMAN2L
STK11	LAMC1	WWC1	SCOC
STAT3	ENTPD7	Nebl	SLC2A3
STARD13	ZBTB46	ank2	MAP2K1
ST8SIA3	GALNT13	KIAA0182	PSMD7
ST6GALNAC2	NSMF	ZNF423	DENND6A
ST3GAL5	ELAC1	epb49	AREL1
SRRM2	ARFGAP2	RECK	RYBP
SRRM1	SIDT1	CCDC28A	SLC41A2
SRPR	MDN1	pprc1	ISLR
SRGAP3	SYNDIG1	SMAD7	CPEB3
SREK1	RET	SMAD3	TPD52L3
SRCAP	WNT3A	Smad5	TRANK1
SQSTM1	AREL1	GABBR1	G0S2
SQLE	HPSE2	CSNK1G1	SMURF2
SPTY2D1	IL7R	SYDE1	SCN2A
SPTLC2	CHEK1	HOXA10	FBXO21
SPSB4	RTN3	OMG	SYNJ1
SPRYD3	PEX13	VAMP1	MAP7
SPRTN	KMT2A	INPP5J	SYT4
SPRED1	DEPDC5	WDR47	DYNLL2
SPPL2B	KCNIP1	TMEM189-UBE2V1	ATXN2
SPIRE2	ZMYM2	UBE2V1P2	SYDE2
SPEN	KBTBD2	TMEM189	RFWD2
SPATA2	TRANK1	Ube2v1	ELL2
SPAST	ATF6	SNX16	FAM91A1
SPARC	LRRN3	dcbld2	DYNC1I1
SP3	CDC14B	eif4e	STK33
SP1	MYLK	LOC100131565	SOCS6
SOX5	NF2	LOC100131693	PDCD4
SORBS3	FBXO21	HIGD1D	PAM
SON	XPO7	LOC100130383	C2orf72
SON	SESN1	HIGD1A	MYT1L
SOGA1	DYNLT3	BACE2	FRY
SOCS6	CABLES2	TBP	PLEKHA1
SOBP	SLC20A2	LOC728115	ARIH1
SNX30	TPPP3	fam60a	CYP26B1
SNX16	RS1	LOC728592	ELMSAN1
SNTB2	PSAT1	LRRC55	PID1
SNRPB	AQP11	C11orf17	RELN
SNRNP200	ANKIB1	PTHLH	PARD6B
SNRK	CHIC1	TSC22D2	CACNA2D1
SNCG	HTR2A	PTHLH	NSG1
SMYD5	LPHN1	PCDHA6	MOB3B
SMURF2	NLRX1	PCDHA8	CDC25A
SMTN	RNF138	zmym2	CDC42EP2
SMIM13	SLC39A10	SUPT16HP	IPO7
SMEK1	RIMKLB	SUPT16H	BZW1
SMDT1	KIAA2022	ARMCX2	PAQR3
SMCR8	MAMSTR	RELN	GHR
SMC3	LRIG1	LOC644037	FOSL2
SMARCA4	RREB1	LOC645691	C16orf72
SMAD7	PLXNA2	HNRPA1L-2	PNPLA6
SMAD2	UBFD1	LOC728643	SUMO3
SLIT2	TUBA4A	HNRNPA1P2	CASR
SLFN11	BTG2	HNRNPA1	BOLA3
SLC9A2	CACNA1E	HNRPA1L3	PIM1
SLC7A5	EPT1	fzd10	MAPK8
SLC6A8	SRSF11	ACOX1	GRM7
SLC4A2	TRIM59	Cds2	TMEM255A
SLC44A1	CSRNP1	WAPAL	XPO7
SLC41A2	RARB	STXBP1	TBRG1
SLC39A14	UBR3	TMEM87A	FAM122A
SLC39A1	NR2C2	eda	USP42
SLC38A9	WBP11	EPHA1	RARB
SLC38A1	FAM189A1	kdsr	DDX3Y
SLC35F5	RTF1	Scoc	EPHA7
SLC30A8	OMG	KALRN	FERMT2
SLC30A7	TMEM43	SYNRG	SEH1L
SLC2A3	SLC11A2	zhx3	BFAR
SLC29A2	LURAP1L	E2F3	TUBA1A
SLC25A3	ZBTB39	TSPYL2	SOBP
SLC25A22	KY	KBTBD2	QKI
SLC25A12	PPAPDC2	MSH5	TTC14
SLC20A2	TBP	Ogt	ZCCHC3
SLC20A1	PDE3B	BACE1	EYA1
SLC1A5	AMER1	BACE1	TLL1
SLC1A4	AFF4	MAP7	NXPH1
SLC18A2	SAMD10	BACE1	C20orf112
SLC15A4	SFT2D3	Ctdspl	MAP3K9
SLC12A7	TTPAL	C10orf46	BTF3
SLC11A2	UBE2V1	Dleu7	VAMP1
SKIL	TLE4	Ogt	SPRY3
SKI	COPS2	PAPPA	IARS
SIPA1L3	PRDM4	PAPPAS	SNAP25
SIK1	LDLRAD2	ATXN2	FLT3
SHPRH	PCDH9	ZC3H6	ARPP19
SHISA5	TAF5	btrc	ACSBG1
SHANK2	KCTD8	SLC12A2	DMTF1
SH3D19	MKNK1	APP	KIF5C
SH3BP5L	GORASP2	SLC6A4	TNRC6B
SH3BGRL2	IFT74	GRM7	C11orf24
SGPP2	CREBRF	WDTC1	FGFR1
SGK1	TENM2	plekha1	RAB11FIP2
SFPQ	C16orf72	Erlin2	RAD23B
SF3B1	SSTR3	Sobp	ATXN7L1
SETX	RABL3	Dsel	PLXNC1
SETD5	ATXN2	Pskh1	SESN1
SETD1B	RAB10	Eya1	RTN4
SESTD1	ITGA10	spen	MIB1
SESN3	USP49	OTX1	RNF217
SESN1	SLC30A8	stk19	CNTNAP1
SERTAD3	ZSWIM3	HOXA3	AP2B1
SERPINB9	ZNRF3	HOXA3	ASH1L
SERPINA1	SLC41A2	pam	TSPYL2
SERINC3	TUBA1A	zmym2	C17orf59
SENP5	E2F7	RAF1	ABL2
SEMA4C	TNFAIP8L3	Ept1	ZNF362
SECISBP2L	GOLGA1	Eya1	PTHLH
SEC61A2	ALDH6A1	PGM2L1	SLC10A7
SEC61A1	UBE4A	PBX3	GPATCH8
SEC23IP	SIDT2	KLC2	GOLGA1
SEC23A	LRRFIP2	RAD23B	GLS2
SEC22C	NAPG	Eya1	FKBP1A
SDC4	PDIK1L	QKI	PLAGL1
SCRN1	DCP1A	Slc13a3	FSD1
SCML1	CSDE1	pou3f2	CHP1
SCFD1	CPD	naa15	FKBP1C
SCARF2	ATP7A	Eya1	FAM110C
SCARB2	PLXNC1	LTB	AC013269.5
SCAMP5	NFATC3	N4BP1	PDCD1
SCAMP3	PPM1D	PELI2	CLDN2
SCAMP2	EIF4B	TMEM189-UBE2V1	HPCAL4
SCAF4	ANKRD46	UBE2V1P2	CXCL10
SBF2	MTMR4	TMEM189	RBBP6
SALL1	TMC7	Ube2v1	STX17
SACS	CAPRIN1	TAB3	KANK1
S1PR1	CARM1	srpk1	NAA15
RUSC1	VPS4A	CARD10	NRP2
RTN4	SUCO	SYPL1	ZBTB44
RTCB	SETD3	KLC4	PPAP2B
RSBN1	MASP1	SLC25A35	RSBN1
RRM2B	KRTAP11-1	KLC4	RNF183
RREB1	STK33	sall3	E2F3
RRAS2	SEMA5B	QKI	CCDC178
RRAGD	LCOR	KLC4	ACVR2A
RRAGA	PPM1E	QKI	TMED8
RPS6KA5	TPD52L3	CRKL	LURAP1L
RPS6KA3	ATG13	AK3L2	EXOC3L2
RPS25	THSD4	AK3L1	FAM189B
RPS14	ATP13A3	UBR3	KLHDC8B
RPRD2	PCDHA3	OTUD4	ARMCX2
RPL27A	GLRX	DRD1	ANLN
RPL19	PCDHAC1	PPP1R12B	DCUN1D1
RPA2	PCDHA9	EFNB2	CLCN4
RP624A23.6	SLC36A1	camsap1l1	FAM135A
ROMO1	FBXL20	PPP1R12B	CDK8
ROGDI	UBE2Q1	COPS7B	GNAQ
RNH1	PPIL1	PPP1R12B	PDIA6
RNF43	IHH	Tgfbr3	AVL9
RNF34	ST8SIA3	MINK1	RORB
RNF217	SLC39A9	eif3a	RAP2C
RNF213	ITGA2	Ubqlnl	CAPRIN1
RNF187	PCDHA13	Tmcc1	HOXA10
RNF168	PCDHA4	SMURF2	PISD
RNF149	PCDHA1	SOX5	BCL7A
RNF138	LHX3	Ubxn10	SVEP1
RMND5A	SCOC	GPATCH8	PHACTR4
RIF1	SIAH1	MAP3K4	CEP55
RICTOR	LAMP3	KCNJ2	VAMP8
RIC8A	PCDHA5	c14orf4	TAB3
RHOV	PCDHA7	tut1	ARL10
RHBDD3	PCDHA2	nlgn1	IRAK2
RHBDD1	PCDHA12	pcdha13	ELMOD1
RGL4	PCDHA6	PCDHA10	SLC36A1
RFWD3	C4orf19	PCDHAC2	USP19
RFK	NISCH	PCDHAC1	SCN3A
REV3L	PFKFB4	COL24A1	FOSL1
REPS1	PDIA6	MAP3K3	FNTA
REPIN1	PCDHA11	XPO4	CLSPN
REEP5	CBX4	PPFIA3	NISCH
RECK	RNF217	CPEB2	DPY19L4
RDH11	APLN	KCNAB1	ZBTB43
RCOR1	MAP3K3	TMEM189-UBE2V1	PPIF
RCAN3	KCNJ2	UBE2V1P2	C8orf58
RC3H2	DLL1	TMEM189	TMEM87B
RBMS1	CHD6	Ube2v1	APP
RBM7	SLC13A1	KCTD8	RNF43
RBM4B	FAM73A	BPTF	TCAIM
RBM4	MED13	Golga1	BCL2
RBM26	DDX3Y	ADAMTS18	CC2D1B
RBM25	A4GNT	Hectd1	ZBTB39
RBM22	RAB23	PLAGL1	GALNT1
RBM19	KPNA1	Rarb	ZC3H11A
RBM14	ABHD13	PPP3CB	PDIK1L
RBM12B	ZNF691	C11orf68	BMPR1A
RBL2	PCBP4	CBARA1	ZNF275
RBL1	DENND6A	MOBKL3	PVRL1
RBFOX2	AKAP11	Kif1c	TMEM178B
RBBP6	PLEKHM3	Cx3cl1	PRR15L
RASA1	CCND1	Rnf41	YAP1
RASA1	SCN3A	HIRA	BICD1
RARS	SPRYD3	Hoxc8	PRKAB2
RAPGEF1	PRRC2C	Rnf41	CNIH3
RANBP9	ENTPD1	SETD3	COPS2
RAI14	TMCC1	BCL2	AP2A1
RAI1	LATS2	TMEM189-UBE2V1	NEBL
RAD51C	KRTAP4-6	UBE2V1P2	LATS2
RAD23B	SOX6	TMEM189	ARFGAP2
RACGAP1	UNC5D	Ube2v1	PMM1
RABL6	CAPN6	spred1	NCS1
RABL6	SNCG	PCDH9	AEBP2
RABAC1	DSEL	ARHGAP12	RASEF
RAB40C	PIAS2	ZCCHC5	CUL2
RAB29	EIF2B2	Smad5	ST8SIA3
RAB18	SNRK	PCDHA9	GRAMD3
RAB14	NEDD9	ZYX	SLC15A4
RAB11FIP1	LSM11	TMEM189-UBE2V1	CSRNP1
RAB10	RSPO3	UBE2V1P2	PAG1
QTRTD1	TMEM161B	TMEM189	OIP5
QSOX1	CD3E	Ube2v1	POU2F1
QSER1	MAP2K1	KIAA0831	ABCG4
QKI	BAG5	ZNF362	BTN1A1
PXYLP1	CD80	stk33	MAP4
PWWP2B	ARHGEF9	usp6	ATXN7L3B
PVRL3	ATXN1L	Dmtf1	RAF1
PVRL1	BFAR	TMEM135	WNT4
PURA	KCTD1	PNPLA6	AMMECR1L
PUM2	JARID2	CCNE1	SYT10
PUM1	RNF165	sh3bgrl2	CTDSP2
PTTG1IP	IGF2R	DCLK1	UHMK1
PTPRF	VPS33B	MOV10	KLF7
PTPN4	SIRT4	Fermt2	PCDHA7
PTPN3	OGT	NFE2L1	PCDHA5
PTPN12	LRP2	wee1	PCDHA12
PTOV1	ARHGEF12	Acsbg1	G2E3
PTCH2	RAD50	Tlk1	ANKS1A
PTBP3	IARS	CHAC1	EIF4B
PSMD7	SMIM21	Zbtb9	PPM1H
PSMD5	USP3	Smad5	PRDM4
PSMC2	ZNF449	Phlda3	PCDHA6
PSKH1	MLLT6	ZBTB10	PCDHA8
PSD	G0S2	SATB2	PCDHA13
PSAT1	CLDN2	KBTBD4	PCDHA1
PSAP	STK38	CPEB3	PCDHA2
PRRC2C	PRKAA1	GRAMD3	PCDHA4
PRRC2B	TMEM33	NRP2	PCDHA9
PRRC1	ARMCX2	GLS2	PCDHA10
PRR15L	GNAI3	MACF1	TAF15
PRPF40A	RUNDC3B	MIPOL1	ATXN1L
PRKRA	CAAP1	WISP1	PCDHAC1
PRKCD	ST7L	APP	CCDC42B
PRKAR2A	ZFHX3	APP	CPD
PRKAR1A	NXPH1	pcdha13	GATAD2A
PRKACA	BMX	PCDHA10	TSPAN5
PRKAB2	KCNC2	PCDHAC2	PPP6C
PREP	WASL	PCDHAC1	CD163
PRDX5	IP6K1	ANKRD13B	ZC2HC1A
PRDM4	KCNAB1	Cdc42ep2	CASK
PPT1	PIK3C2B	pcdha13	YTHDC1
PPRC1	LITAF	PCDHA10	VMA21
PPP2R5C	LAMP2	PCDHAC2	PPP2R5C
PPP2R1B	DENND1B	PCDHAC1	LCOR
PPP2R1A	KIF5A	ELMO2	HPSE2
PPP2CB	ITGBL1	CEP350	SPSB4
PPP2CA	MFN2	LRIG2	CAMKV
PPP1R21	HIRA	GRM7	CREBRF
PPP1R2	SLC35F5	KANK1	DCAF7
PPP1R14C	SH3BGRL2	LOC647886	GPN1
PPP1R11	KIF1B	taf15	CBLC
PPP1CC	MAP3K4	smarcd2	JARID2
PPM1K	SH3BP2	HMGA2	RAPGEF2
PPIG	DLL4	Rab11fip2	EFNB2
PPFIBP2	HAS2	RET	NUP50
PPAPDC2	NUAK1	ppp1r11	UBFD1
POLR3K	USP12	wibg	YWHAQ
POLR3H	SMAD3	C16orf72	IGF1R
POLR3F	PAQR3	ank2	SPTLC1
POLR2L	HMBOX1	CDC25A	ZSWIM3
POLR2H	SLC4A4	EGLN2	C20orf194
POLR2D	PRR15L	ELMO2	PRKAR2A
POLR2A	KLC4	Sik1	EIF3M
POLR1C	PTHLH	FRMPD1	CBFA2T3
POF1B	PARP14	PPM1E	SSR1
PNPLA6	TARBP2	ywhaq	RASSF4
PNPLA4	TPT1	Bach2	FAM101B
PNN	COL4A3BP	CDC25A	FICD
PMPCA	UBN1	GGA3	CTNNBIP1
PML	TSPAN5	EIF2C1	SLC4A4
PLXNB2	ASB1	trim2	SCN1A
PLXNA1	PPP2R1B	nxph1	CMPK1
PLEKHM2	ZFYVE1	Cobll1	EGLN2
PLEKHG4B	DRD1	Acsl4	DNAJC5
PLEKHB2	RAB3GAP1	Wnt7a	MPHOSPH9
PLEKHA3	SYDE2	Cdk5r1	ZHX1
PLEKHA1	EYA4	Rnf144b	NRBP1
PLAU	DENND2C	PID1	ARHGDIA
PLAGL2	SSRP1	PHIP	DNAJA2
PLAG1	TNRC6B	SMYD5	PI4K2B
PLAA	SMAD5	fam70a	CHD2
PLA2G15	CRKL	PHF20L1	ENAH
PLA2G12A	MAP3K9	SEMA6D	KCNQ5
PKM	WIBG	rap2c	EGLN1
PINK1	SALL4	SEMA6D	CHPT1
PIM2	EGLN1	SEMA6D	SH2D2A
PILRB	ATXN7L3	CCND1	ADRB2
PILRB	IRAK2	PI4KB	FZD6
PIK3CA	MAFK	SEMA6D	LRIG2
PIGV	DIEXF	TFAP4	B4GALT1
PIGS	PID1	PDK4	CLOCK
PIGO	NAV1	PLAG1	CALU
PIGB	NRBP1	PLAGL1	PNISR
PIDD1	BCL2L2	Map2k3	TSC22D2
PIAS2	CUL2	Phf15	LRIG1
PIAS1	COLQ	SYNJ1	NAT8L
PI4K2B	SPEN	MAP2K1	TXN2
PHLPP2	B3GNT2	KIF23	SLC39A9
PHLDA3	RFWD2	HOXA10	SOWAHC
PHKA1	ASTN1	BTG2	CCDC85C
PHIP	TRAK1	seh1l	ZC3H6
PHF3	ZNF654	Pex13	SOCS5
PHF12	SEMA3D	Sema3d	SIAH1
PHC3	PROSC	SLC4A4	NPAS3
PGRMC1	HOXA3	SYPL1	SSTR3
PGLYRP2	C15orf41	FRY	USP6NL
PFN2	DYRK1B	CACNB1	RREB1
PEX19	SLC35G1	PPP2R5C	BAG5
PER2	EPHA1	ATP2B2	C11orf68
PEPD	NUCKS1	Vamp8	MAP2K3
PDS5B	ANKRD34C	Rtf1	LAMTOR3
PDS5A	DIXDC1	C5orf41	WIF1
PDP2	ANKS1A	CPEB2	TGFBR3
PDIA6	ADAMTSL3	CLOCK	PANK1
PDHX	WIF1	Pim1	IL2RB
PDGFC	ATG9A	asph	ITGA2
PDGFA	SUZ12	asph	SYNDIG1
PDE4DIP	OTUD5	STX1A	BACE1
PDCD4	CCNY	purb	KLHL15
PCMT1	LHFPL5	Sptbn2	LRP6
PCM1	TRABD2B	fbxo33	NAPG
PCDH9	UNC119B	SYNE1	CRIM1
PBXIP1	HPCAL4	CECR6	SNX11
PBX3	SIK1	GGA3	DCUN1D4
PARP16	CD164	CDC37L1	PNRC2
PARD6B	DCAF8	PPM1D	ITPRIPL1
PAPPA	PBX3	HTR4	ATP7A
PAM	CDC25A	Igf2r	COBLL1
PALM2AKAP2	LEPREL1	RANBP3	LHX1
PAG1	2017-03-04	SLC20A2	SLC25A22
PAFAH2	STX17	B4GALT1	PDPR
PAFAH1B2	VAPB	Taf5	COL24A1
PAFAH1B1	ADCY5	eda	DCTN5
PABPC4	RAP2C	FAM81A	RAB3D
OTUD7B	ITPR1	ELL2	SMAD3
OTUD4	CD28	SLC24A3	SHROOM4
OTUD3	NTRK2	Ube4b	TCTE1
OTUB1	DNAJB4	GLUD2	KIAA0226L
OSCAR	SLC9A8	fchsd2	MFN2
ORMDL3	KCNU1	RNF138	2017-09-11
OOEP	CLDN12	Gabra1	PPFIA2
OGT	YIPF6	KCNQ5	NBR1
OGFR	CCDC18	FAM134A	ATF6
OGFOD1	FLT3	SCN4B	NKD1
ODC1	DYNC1LI2	CD164	EED
OBSL1	FSD1	KCNAB1	FOXK1
NUPL1	FGFR1	MSH5	MOCS1
NUP98	ARHGAP5	SOX5	2017-03-05
NUP210	PCDH17	ANKRD57	CRK
NUP160	FAM160B1	abcc5	HOXC8
NUP153	FCRL2	ATP2B2	MT2A
NUFIP2	SLC25A30	PDPR	DNAJC16
NUDCD1	TBC1D20	FCHSD1	PAFAH1B2
NUCKS1	TMEM178B	pth	ZDHHC14
NTN1	AFAP1	SLC2A3	ACACB
NTMT1	SPSB4	SAPS3	RAB40A
NSUN2	ZCCHC2	TBPL1	ESRRA
NSRP1	TRAM1	PEX5	TRIP11
NSF	WNT7A	Ell	SMAD5
NSD1	ATXN7L2	HOXC11	DIXDC1
NRIP1	TBC1D16	TUBA1A	MBNL2
NRBP1	ARL2	KCNAB1	EMX1
NR3C1	PPAP2B	LUZP1	FAM60A
NR2C2	TBC1D13	MINK1	PWWP2B
NPTN	REEP1	PRKAR2A	PRPF38A
NPPC	CENPN	capn3	CDC23
NPM1	MBTPS2	Klhl26	SRSF11
NPEPPS	ERC2	btrc	SH3BGRL2
NOTCH3	ZBTB33	MSH5	PLCD1
NONO	TRAF6	Sfrs5	TBP
NOL4L	PURA	MSH5	CHD7
NOC2L	FAT3	SFRS11	IRS1
NME4	SMPD1	pam	SNRK
NME3	GPN1	BAG5	SOX5
NLRP1	CPSF6	AP2A1	RAB4B
NLGN2	PRTG	SPRY4	CNIH2
NKX31	FGF9	Adamts3	LPP
NKAP	COX15	RUNX1T1	HECTD1
NIN	SNX18	RUNX1T1	HAS2
NHLRC2	TIMM22	BPTF	EZH1
NFIB	AGK	RUNX1T1	FAM63B
NFE2L1	ABHD2	Acsl4	SIDT2
NFATC3	CLCN5	STRADB	EIF2B5
NF1	TTC14	WBP11	TVP23B
NET1	CD40	Capza2	GPSM3
NEMF	ZNF326	BDNF	GAN
NDUFAF3	FRMPD1	arl2	PTGFR
NDST1	ZBTB5	BDNF	JPH1
NDNL2	ISLR	BDNF	KBTBD2
NDC1	DOLPP1	capn3	CEP85L
NCOR2	FNDC3B	RBBP6	ESRP1
NCLN	TSPYL2	Kif5a	COL12A1
NCAPD2	SKI	CADM1	SIPA1L2
NBEA	DRD5	BDNF	SERBP1
NAV1	USP15	BDNF	MLK4
NATD1	CDK5R1	Axin2	CCDC28A
NAT8L	CHORDC1	CMPK1	TRABD2B
NARF	MAN2A2	PISD	TBC1D19
NAPG	ATP1B4	Pafah1b1	KCTD8
NAE1	MRAS	SEMA6D	KIAA0319L
NACC2	PWWP2B	CCNYL1	RET
NAB1	PDXK	VAMP1	KHNYN
NAA20	TAOK1	RYBP	RRAGA
N4BP1	TSC1	KANK1	GTPBP1
MYO5C	ISOC1	LOC647886	TMEM154
MYO5A	NSG1	HOXA3	2017-03-04
MYO1G	ZNRF2	RNF43	USP44
MYL12A	GLUD1	BMX	PIAS2
MYC	C17orf85	DYNC1LI2	MTMR3
MYB	CECR6	sptlc1	ITGA10
MYADM	FAM89A	CDCA4	HDGF
MUT	WAPAL	SOX5	PDCD6IP
MTMR3	GHR	ACOX1	RELT
MTMR2	FZD4	GRIN1	CYGB
MTMR1	MYB	Arcn1	EFCAB10
MSN	TMEM74B	esrra	AL163636.6
MSL1	BCL2L13	CD28	AKIRIN1
MSI2	BZW1	COPS7A	ZCCHC2
MRPS25	SEC14L4	C1orf21	SWAP70
MRPS2	PPP6C	LMAN2L	ZCCHC5
MRPL1	SMIM13	KIF23	PDE3B
MOSPD2	ALDH1A3	ATP13A3	PRSS12
MON2	RPRD2	PPP2R1A	STK38
MON1B	IRF4	MAMSTR	WNT10B
MOB4	MIPOL1	LPHN2	UBN2
MNT	HSPA1B	PDCD4	HNRNPA1
MMP9	SYNRG	cpd	AGO1
MME	LRRC27	CAMKV	NHLRC2
MMD	APLNR	YWHAH	AFF4
MLLT4	CMKLR1	sesn1	PDK3
MLK4	PPP1R2	C13orf18	SLITRK1
MLEC	COBLL1	PPP1R2P4	FAT4
MKNK2	SLC12A1	LOC100128626	CHORDC1
MKL2	IRF1	Cbfa2t3	FAM63A
MIPOL1	PDCD11	RASGEF1B	ISM2
MIDN	C11orf68	rassf5	HMBOX1
MICA	COPS7B	Cdc42	TMEM135
MIB1	BCL11B	CDC42P2	RNF111
MIA3	PSKH1	Enah	ZNF423
MGP	TATDN3	OCRL	RGP1
MGAT4B	NOB1	ENSA	EIF4E
MGA	VAMP1	ENSA	TAF7L
MFSD5	GALC	ENSA	PIK3R1
MFAP2	LMAN2L	BACE1	EXTL3
MFAP1	ENAH	EPHA7	HEPHL1
METTL9	HEPHL1	ARPP21	SLC7A1
METTL4	PPAP2A	VAMP7	LURAP1
MED1	GALNT1	zbtb46	SLC6A4
MDN1	EIF3A	ZCCHC2	PTCH1
MDM2	MFAP5	D4S234E	WWP1
MDH2	SLC4A7	mras	TLCD2
MDH1	UBL3	esrrg	SRP72
MCL1	LRRC8C	MOBKL3	PSAT1
MBP	FZD10	c9orf5	ABCF1
MBOAT7	LRRC7	EPB41L4B	ARHGAP5
MBNL2	SH3GL2	POM121	PRPH2
MBIP	ARHGAP20	Bcl2l2	ZYX
MBD3	RUNX1T1	stk19	YRDC
MAVS	GPR124	Kif5b	SLC25A37
MATR3	STEAP3	YTHDC1	HIPK3
MAT2A	OTUB2	CHD9	FBXO33
MAST4	ANK2	Dach1	BPTF
MARK1	ANKRD29	cul2	COL4A3BP
MARCKS	HARS2	SIDT1	CLCN3
2017-03-07	PLEKHB2	CASKIN1	CECR6
2017-03-05	PPM1K	RNF125	PPT2
MAPRE3	TFCP2L1	SNX33	FBXO17
MAPKAP1	OSBPL3	FOSL1	THUMPD1
MAPK9	ACVR2A	Lrp1b	RANBP3
MAPK8	GSKIP	BCL9L	LRCH3
MAPK14	CALU	RSBN1	GCNT4
MAP7	GRAMD3	Fndc8	RPP14
MAP4	ELK4	cnih2	PCDH17
MAP3K9	FRYL	Fam116a	SPOCK3
MAN1A1	TMEM135	Mapre1	IL10RA
MAGED1	CPNE1	Ano3	COPS7B
MAFK	SVEP1	SGK1	ANKIB1
MAFG	MICAL3	TSC22D3	EPHA1
MACF1	SWAP70	GRAMD4	EIF5A
LYPLA2	ARPP21	Dync1i1	CAMSAP1
LY9	WDTC1	Hspg2	LAMC1
LY6G5B	NEURL1B	Pcdha4	CIAPIN1
LY6E	SSR1	PCDHA1	LPHN2
LTBP1	SNRNP48	Nfatc3	MAP3K3
LTB4R2	NBR1	Esrp1	ISOC1
LSM14B	MXD3	NCS1	GNA12
LSG1	PIM1	C1orf9	SLC23A3
LRRK1	UBE2J1	TMEM90B	ABTB2
LRRC59	LRRTM2	MMD	CINP
LRRC47	EIF5A2	NUAK2	ARL5B
LRRC41	MAPRE1	SEMA6A	NBEAL1
LRRC1	FKBP1A	HAS2	TTL
LRPPRC	AATK	DIXDC1	ABCF3
LRIG1	GYLTL1B	Hspa4l	UCP2
LRBA	EYA1	LYRM5	ZBTB10
LMO7	CCDC88C	cldn12	PAX7
LMF2	AMMECR1L	lrrn3	ADAMTS5
LMAN1	NPC2	E2F7	RAPGEF1
LFNG	MYLK4	TFAP2D	PBX3
LENG8	ERCC6	znf367	LRP1B
LDOC1L	HECTD4	lrrfip2	PHLDA3
LBR	PHF21A	LOC727896	SALL1
LATS1	PRR13	CHORDC1	PSKH1
LARP4B	SLC7A2	2017-09-02	EDAR
LARP4	TMEM198	Ube2q1	FURIN
LARP1	DESI1	RNF31	NR2C2
LAPTM4A	C3orf70	DLL1	C9orf69
LAMTOR1	RCOR3	DHDDS	RGPD6
LAMC2	BACE1	MOBKL2B	SOS2
KTN1	AVL9	EIF4B	VAMP7
KRT18	PARVA	EIF4BP7	PELI2
KPNB1	PRKG1	IL1RAPL1	UBL3
KPNA5	ZSCAN31	col12a1	ANKRD34A
KPNA1	ACSL4	Znf622	TNFAIP1
KMT2D	SOS2	Snrk	CDK6
KMT2C	GTF3C5	Rnf217	SUCO
KLHL26	ZNHIT6	Lats2	EN2
KLHDC3	RNMT	mtmr4	FRS2
KLF7	PHIP		FZD4
KLF5	ARL8B		OCRL
KLC1	ZBTB9		ATG13
KIFAP3	PHF20		NOS1
KIF5C	TMEM154		KIF3B
KIF5B	STXBP1		ZBTB9
KIF2A	SLC25A15		WAPAL
KIF23	IPPK		UBE2W
KIF21A	SLC16A6		ZNF367
KIF1B	ATP5G3		PPP2R1A
KIF14	VTI1B		PDAP1
KIAA1551	FGF7		ADAMTS3
KIAA1549L	SPTBN2		SALL3
KIAA1522	LYPD5		ADAMTSL3
KIAA1468	CLUH		KATNB1
KIAA1467	BCAP29		POLR3D
KIAA1432	GCC2		MT1H
KIAA1328	TRPC1		C14orf1
KIAA1161	RPS6KA6		PIP4K2C
KIAA0391	PEAK1		AIFM1
KIAA0368	CEP55		KLC1
KIAA0232	PRICKLE2		ARHGAP18
KIAA0100	SCN1A		AKAP12
KHNYN	AGO1		SMIM13
KDSR	BDNF		CACNB1
KDM6A	ABCC5		ANKRD13B
KDELR2	BSDC1		AMMECR1
KCTD20	PLRG1		TASP1
KCTD10	PPP6R3		MINOS1
KCNN4	FOPNL		TMEM248
KCMF1	ZBTB10		PEX5
KBTBD2	ANXA11		LRRN3
KATNAL1	LAMTOR3		GABPA
KAT6A	DCUN1D4		POLE4
KARS	USP14		SLC12A2
KANSL2	DNAJC25		CSF1
KANK2	C15orf57		AGO3
JOSD2	RBM12		ELMO2
JMJD1C	KIAA1804		ZBTB37
JKAMP	SH2D2A		GATA4
ITPR2	FAM65C		A4GNT
ISYNA1	CHD2		PPM1A
IST1	PI4K2A		GCC2
ISG20L2	COL24A1		DZIP1
IRS4	ODF2		FAT3
IRF2BPL	CXCR5		AMIGO3
IRF2BP2	GTPBP1		CDV3
IRF2BP1	FOXK1		NAV1
IRF2	PIK3R1		AMIGO1
IRF1	ACOX1		SCN4B
IREB2	PHLPP2		FRYL
IPO9	PLD1		SLC22A17
IPO8	PCNX		EBI3
IPO7	B4GALT1		RSF1
IP6K1	FLCN		CAPN6
INPP5E	SLC2A13		SAMD4A
INPP4A	CDC42		CBX6
ILF3	PCSK5		AGAP2-AS1
ILF3	SMARCD2		SRSF10
IL6ST	ABTB2		NOTCH2
IL2RB	MMD		ADAP1
IKBKB	ABCG4		PTPRJ
IHH	IRF2BPL		SLC39A10
IGFBP5	ZNF662		FAM81A
IGFBP3	SOGA3		MTFR1L
IGF1R	PELI2		SLITRK6
IFT74	GORASP1		RP11-73M18.2
IFNGR2	RDH13		ESRRG
ICAM1	KIAA0930		FAM65B
HUWE1	STX1A		FAM58A
HTT	PSMA5		CD69
HSPG2	NCS1		SENP5
HSPBAP1	SYS1		SORT1
HSPA9	BRWD3		WWC1
HSPA5	CBFA2T3		GJA9
HSPA4	NAPEPLD		ADORA2A
HSPA1B	UHMK1		SLC35A4
HSP90AB1	RYBP		RASSF5
HSP90AA1	CLCN3		VPS37C
HSDL2	CACNB1		ZNF654
HSD17B4	CCNT1		HSPG2
HS3ST3B1	GOLT1B		PUF60
HPS3	ELMOD1		CGNL1
HNRNPUL2	ZCCHC5		CSDE1
HNRNPU	C5orf63		FAM189A1
HNRNPLL	PIKFYVE		FKRP
HNRNPDL	NIN		SIK1
HMGA1	BACH2		CCDC88C
HLADQA1	GABPA		CX3CL1
HK1	SGPL1		KIF1C
HIVEP2	DENND4A		CHD6
HIST1H4C	NELFA		EIF3A
HIST1H1C	ZNF609		CD164
HIPK2	TFDP2		POM121C
HINT1	RPS6KA3		AOC1
HIATL1	SMYD4		TMC7
HIAT1	ZNF488		GPC6
HGSNAT	SEC24A		CARD10
HGF	TMEM41A		TMPPE
HEXIM1	LOC102724135		SYTL2
HES1	IDH3A		ERLIN2
HELLS	CXorf40B		ATP10B
HECTD4	STON1		MN1
HECTD1	STXBP5		ACOX1
HEATR6	PGM1		ITPRIPL2
HEATR5A	ZNF518B		GRB10
HEATR2	ZNF267		CNNM2
HEATR1	CDC27		CENPBD1
HDHD2	PTPRO		KLHDC10
HDGF	USP44		LMO7
HBP1	LOC101929479		MYADM
HADHA	DEDD		SETD1B
H2AFV	RICTOR		ETV3
GYLTL1B	PNPLA6		NCKAP1L
GUSB	SLC25A43		BEST4
GUCD1	PITPNM3		PPP1R11
GTF3C4	FDFT1		RBPJ
GRSF1	PIGB		WDTC1
GREB1	CHPT1		LRRK1
GRB2	VCL		ASB7
GRAMD3	PPFIA2		NSF
GRAMD2	LRP1B		RORA
GPR25	SEC61A1		MSL1
GPR157	PXMP4		SPOCD1
GPR137B	SLC36A2		ZFHX4
GPC4	FAT4		KPNA5
GPBP1L1	TTC39B		UBE4A
GPATCH2	GGA3		FAM160B1
GPAA1	POLD3		IRF2BP1
GOSR1	ZAK		GRAMD2
GOLGB1	FAM120C		NRN1
GOLGA3	LCP1		ELOVL6
GOLGA1	HMGA2		CRISPLD2
GNB2	NFAT5		LIPE
GNAQ	PHC3		SEMA5B
GNAI3	TSEN2		FAM171A2
GNA13	PTPRJ		RFWD3
GNA12	INPP5J		FSTL1
GLI2	RNF41		INPP5J
GLCE	RABGAP1		USP14
GIGYF1	ZNF704		CLASP1
GFPT1	WDR47		CRTC3
GET4	DCUN1D1		SFXN2
GDPD5	PLEKHH1		FBXL20
GDE1	MMS19		PCSK5
GBF1	EPB41L1		GPR124
GATAD2B	SEL1L		SKOR1
GATAD2A	MAPK1IP1L		SLC38A7
GATA3	EIF2B5		PHF20
GART	IL10RA		NUCKS1
GAN	C11orf24		NFE2L1
GALNT7	CCDC179		SLC24A3
GALNT3	HN1L		MAP3K4
GALNT2	CCDC28A		STAG1
GALNT1	AMMECR1		KPNA1
G3BP1	KIF3B		UNG
FZD6	MRS2		RAB35
FYCO1	SEMA3A		TRAF3
FUCA2	BVES		PRRC2C
FTCD	ARHGAP19		ADAMTS13
FSTL1	BPIFA1		AMOTL1
FRYL	SLC25A12		IDH3A
FRS2	RPS6KB1		IRF2BPL
FRRS1L	SAMD4A		KIAA0226
FRMPD3	ARMC8		PDLIM5
FRK	DCAF5		HOXA3
FREM2	DSCR3		TMEM170B
FOXK1	PPM1L		MBD1
FOSL2	C17orf59		IL1RAPL1
FNDC3B	BCL7A		RHOBTB2
FNDC3A	2017-09-11		SNIP1
FNBP4	ALX4		SEC24A
FN3K	NUP210		ARRDC4
FLVCR2	ATP6V1B2		GIT1
FITM2	ZNF362		TNIK
FITM1	LRRK1		TSC22D3
FHDC1	GPBP1		DYNC1LI2
FGF2	ATP8A1		TBC1D20
FGD4	SLC4A8		DIAPH2
FEM1B	SRPRB		MACC1
FECH	LYPLAL1		CLCN5
FBXW7	CARD10		ZBTB33
FBXW2	MAP2K3		NPEPPS
FBXO3	VAT1		KPNA4
FBXL19	WISP1		LIX1L
FBN2	PRKAB2		PLXNA2
FAT1	ACSBG1		ZKSCAN1
FASTK	CD274		OTX1
FAM98A	MYO5B		TP53INP1
FAM73A	TXNRD2		TRAK1
FAM46A	TGIF2		CNKSR2
FAM214A	CNTNAP1		SPRY4
FAM208A	LY9		DLL4
FAM199X	HSPE1-MOB4		PIEZO1
FAM189B	COL12A1		PRKCD
FAM179A	SPTLC1		AGO2
FAM160B1	TMEM41B		HOXC11
FAM160A1	UBXN10		KSR1
FAM126B	NEUROG3		PTPRM
FAM120A	AK9		PURB
FAM118A	LPHN2		SEL1L3
FAM111A	G6PD		RSPO2
FAM110C	PCLO		OTOGL
FADS2	RORA		FOXP2
EZH1	SIX4		NDOR1
ERN2	FBXO22		PAPPA2
ERMP1	KMT2D		PAPD4
ERLIN2	PLA2G15		BHLHE41
ERLIN1	DOCK4		GALNT13
ERICH1	SUPT16H		PRKG1
EPS15	CCDC149		VAT1
EPN1	RGMA		GPRIN3
EPG5	MBNL2		LHX4
EPC1	DZIP1		HS3ST3B1
EPB41L4A	EPB41L5		DEDD
EPB41L2	ANKRD13D		ATP2B2
EP300	GNA12		MLTK
ENTPD6	WWC1		XPO4
ENTPD4	AK4		ZNF532
ENGASE	SMIM12		LTBP4
ENDOV	TLCD2		CHD9
ENAH	COMT		MLLT6
EML4	ZKSCAN1		RIC8A
EMD	NUFIP2		TRIM29
EMC4	ELMO2		KMT2D
ELOVL5	DEPTOR		DEPTOR
ELMSAN1	CACNA2D4		PAX2
ELMO2	IGSF23		KLHL26
ELL2	GPR133		KDR
ELAVL2	RHPN2		NF1
EIF5B	HIF1AN		BACH2
EIF5A	HSPG2		CTDSPL
EIF4G3	JPH1		TLE4
EIF4G2	YAP1		IGF2R
EIF4G1	ATP2B2		MTMR4
EIF4A2	SLC6A4		C16orf52
EIF3A	AC079610.2		RPP14
EIF2S3	GPR137		RIMKLB
EIF2B5	FCHSD1		MYLK4
EIF2AK2	RNF43		GABRE
EHMT1	NFASC		SMURF1
EFNA1	SMAP1		SMYD5
EFEMP1	NOTCH2		LIN7A
EEF1D	CHUK		AMOT
EEF1D	CCDC85C		WNK3
EDC3	TM9SF2		RICTOR
EDARADD	THRB		NCOR2
ECHDC1	CHMP1A		GDPD5
E2F3	CASZ1		ETV1
E2F3	ATXN7L3B		SKI
DYRK2	MAN2A1		DDX54
DYRK1B	ABCB5		CASKIN1
DYRK1A	CDHR1		RBM12
DYNLL2	SF3A3		ATP13A3
DYNC1H1	GOLGA4		CDC25B
DVL3	ZNF346		EML6
DUSP2	KLHDC8B		UQCC1
DUS1L	ZC3H12C		KPNA3
DST	DMTN		MNT
DSE	KATNB1		DLST
DOPEY2	UNC13A		B4GALNT3
DOCK6	ELL2		PPFIA3
DNM1L	ITFG3		TEAD1
DNM1	NFRKB		ATF7IP2
DNAJC5	KCNA6		CCNJL
DNAJC24	HTT		FAM134A
DNAJC16	RASSF2		ARHGAP17
DNAJB4	PSME3		EXOC5
DNAJA3	CACNB4		ZADH2
DNAJA1	STK32A		CREBL2
DNAH14	MBNL3		OS9
DMXL2	RPRD1B		FNDC3B
DMTF1	SSBP2		RNF152
DLL1	MMAB		KCNAB1
DLD	SGCA		CNN1
DIEXF	PDCD6IP		FGF9
DICER1	SON		NFATC3
DHX36	WNT8A		BAG4
DHX33	MAP4		BCL11B
DHX15	ALOX12		KIAA0513
DHRS2	DUSP3		CDK4
DHRS13	SCN2A		STXBP3
DESI1	AGPAT6		MYO1C
DENR	OSCAR		RCOR3
DDX6	SSFA2		FBXO27
DDX5	SYNE1		RABAC1
DDX46	SUPT7L		ADCY5
DDX28	RAF1		DACH1
DDX21	PAX7		KCNC2
DDX1	CXorf40A		PCGF5
DDOST	GALNT7		WASL
DDI2	OTUD6A		RNF14
DDB1	SIM2		PPP6R3
DCTN5	DIAPH1		LMAN2
DCTN4	FAM84B		CACNA1I
DCP2	FAM161A		ACSL4
DCP1A	PNMAL2		EVI5
DCBLD2	RPH3AL		XPR1
DCBLD1	DIRAS2		TAOK1
DCAF7	DPH3		ZFHX3
DARS	KATNAL1		STOX2
CYP51A1	PRR5L		ANGEL1
CYLD	NIM1K		ATP1B4
cyclinD1	MTMR11		C12orf49
CXXC1	SCAF11		ERC2
CXorf40A	PDP1		KRAS
CXCL8			MDN1
CXCL5			PIK3C2A
CUX1			MON1B
CUL1			ZNF518B
CTPS2			LIN28B
CTNNBIP1			RBM23
CTNNB1			ROR1
CTDSP2			ZNRF3
CSNK1A1			ADAMTS18
CSDE1			KLC2
CRKL			LPHN1
CRK			PTPRD
CRIPAK			ZNF436
CREG1			TBL1XR1
CREBRF			SNX33
CREBBP			SYDE1
CREB1			MED20
CRAMP1L			NLRP1
CPXM2			FOXO1
CPT1A			UBE2QL1
CPSF6			RP11-192H23.4
CPEB4			FLJ45079
CPEB3			NUP210
CPEB2			UBR3
COX20			TRIM66
COQ5			LRRC58
COPS7B			DHTKD1
COPS7A			NFATC2
COPB1			PLXNB1
COMT			DSEL
COL5A1			USP12
COL4A5			XKR4
COL12A1			PLEKHH1
COG3			STXBP1
COASY			MBTPS2
CNST			AATK
CNOT6			ACTR1A
CNOT1			BCR
CNKSR3			SKIL
CNIH1			CLUH
CNBP			SEMA3D
CMTM4			DAB1
CLTC			FAM199X
CLPX			SLC6A11
CLNS1A			MIF4GD
CLMN			SLC43A1
CLDN4			FHDC1
CLDN12			FAM122B
CLCN3			UBAP1
CLCA1			ENTPD5
CLASP2			BSDC1
CLASP1			UNC5B
CKB			TMEM259
CKAP4			EFCAB4A
CIRBP			AHCYL2
CIRBP			CSRNP2
CIDEB			RLIM
CHPT1			KIAA1549
CHPF2			CHIC1
CHPF			AHNAK2
CHMP3			FNIP2
CHD9			OXA1L
CHD7			LRRC15
CHD6			ADNP2
CHD4			EYA4
CHD2			CHRM3
CHAC1			ELK4
CGGBP1			RIMS3
CFLAR			PIM3
CFLAR			PHLPP2
CERCAM			AC174470.1
CEP83			LRRFIP2
CEP170			KCTD1
CENPU			RAB11FIP5
CENPN			ROCK1
CELF1			SLC4A7
CDV3			GPR153
CDS2			STRN
CDS1			OTUD4
CDKN1A			SCUBE3
CDK6			MKX
CDK6			CRAMP1L
CDK5R1			VTI1A
CDK4			GDI2
CDK2AP1			PHF15
CDIPT			NFRKB
CDH1			MYO5A
CDCA4			YIPF6
CDC73			LHPP
CDC7			KCNK7
CDC42SE2			ZNF704
CDC42			ONECUT2
CDC37L1			CHD5
CDC27			PPM1L
CDC25A			ZC3H12B
CDC14A			FAM134C
CD46			UBXN10
CD44			GNA13
CD300A			PODXL
CD2AP			FAF1
CD164			PPIG
CD151			ARHGAP32
CCT4			AVEN
CCSER1			WISP1
CCNT2			DIAPH1
CCNT1			RBM24
CCNG2			HMGXB4
CCNE2			MINK1
CCNE1			GSE1
CCND3			NYNRIN
CCND2			SHROOM3
CCND1			UNC13A
CCNC			RAB10
CCNA2			ABI2
CCDC59			GAS2L3
CCDC47			NAPEPLD
CCDC127			SEC31B
CCDC102B			DPP8
CBX6			PAK7
CBX5			TRAM1
CBX4			TNPO1
CBLC			ZNF629
CAPZA2			CACNA1E
CAPRIN1			PI4KB
CANX			POU3F2
CAND1			WDR47
CAMTA2			DCAF8
CAMTA1			GLCE
CAMSAP2			USP31
CALU			RAD51L3-RFFL
CALR			HCN1
CALM1			VTA1
CAD			LIN28A
CACUL1			PHKA1
CACNA2D1			ZNF469
CAB39			EDNRA
CA9			RAB37
CA2			ARHGAP20
C9orf91			GLUD1
C5orf30			PI4K2A
C3orf67			TRIP10
C3orf62			DCAF8
C2orf69			FKBP5
C2orf47			TSPAN9
C1orf85			JMJD1C
C1orf52			CD2AP
C19orf48			TBC1D9
C16orf72			PI4K2A
C14orf119			FCHSD2
C12orf76			JOSD1
C12orf5			MAPK1IP1L
C11orf58			CBX5
C11orf49			KATNAL1
BZW1			SEMA3A
BYSL			OGT
BVES			FANCB
BTRC			PPM1K
BTRC			RFFL
BTG2			DHDDS
BTBD9			TERT
BTBD3			EIF5A2
BTAF1			STXBP5
BSDC1			SPEN
BRWD1			CERS1
BRWD1			ZER1
BRI3BP			DDX3X
BRD3			GOLT1B
BNC2			PCDH1
BLVRB			FBXO10
BIRC5			PKDCC
BIK			KCNC4
BFAR			RGMA
BET1L			FUBP1
BECN1			PITPNM3
BDKRB2			DLGAP2
BCL2L2			CDCA2
BCL2L12			ATG14
BCL2L11			DENND2C
BCL2			KCNE4
BCAP29			TMEM38A
BAZ2A			SGSM2
BARD1			2017-03-09
BAMBI			TXNIP
BAI2			LONRF3
BAG6			ARHGAP35
BAG5			CDK12
BACH1			MCF2L
B4GALT1			TADA2B
B4GALNT3			MMP24
AZIN1			ESR2
AUP1			ZNF831
ATXN7L3			NPR3
ATXN1L			CDX2
ATP8B2			MED1
ATP6V1G1			PPP2R1B
ATP6V0B			ALX4
ATP5G3			VWA7
ATP2B1			WDFY2
ATP2A2			TET3
ATP2A2			SOX6
ATP13A3			GIGYF1
ATOX1			MGAT4A
ATG9A			SUPT16H
ATG13			TBX18
ATF7			TCF3
ATF2			TM7SF3
ASXL2			B3GALT1
ASXL1			PABPC1L
ASPM			SREK1
ASNSD1			STYX
ASH1L			ARHGAP26
ASCC3			PSMA5
ASB1			C10orf76
ASAP1			SNX1
ARRDC4			HECTD4
ARPP19			WDR37
ARPC1B			DCAF5
ARMCX2			SPTBN2
ARMCX1			SGMS2
ARMC1			CHRNE
ARL8B			CDS2
ARL5B			BCL9L
ARL2			PDZD8
ARID5B			TYRO3
ARID2			SLC5A3
ARHGEF18			SLC5A3
ARHGEF11			ANKRD33B
ARHGDIA			PPAN-P2RY11
ARHGAP32			EPB41L1
ARHGAP12			A1CF
ARFGEF2			NLGN1
ARFGAP3			AKAP11
ARF3			COG3
AREL1			GPN2
ARCN1			VAV2
APP			IL17RE
APLP2			CAST
APBB1			ZNRF2
AP2B1			CAB39
AP000721.4			IGF1
ANXA5			PSME3
ANXA4			SIX5
ANXA11			IPO9
ANLN			MYEF2
ANKS6			TUBA4A
ANKRD52			BRI3BP
ANKRD36			LDLRAD4
ANKRD28			AGPAT3
ANKRD23			DRP2
ANKRD17			CD180
ANKRD12			PLXNA4
ANKIB1			SLC9A3R2
ANKH			SPATC1
ANKEF1			NAA25
ANAPC13			MUC2
AMOTL1			TXLNG
AMOT			FADS6
AMMECR1L			KMT2C
ALS2			TSC1
ALDOA			PITPNA
ALDH18A1			NFASC
ALCAM			NUAK1
ALAD			ATXN7L2
AKT3			TMEM87A
AKR1A1			AC005003.1
AKAP11			MAP1A
AKAP10			ARMC5
AIP			KIAA0586
AIM1			SPRTN
AIG1			SETD6
AHCTF1			TRIM45
AGRN			TOMM20
AGPAT3			PLXNA1
AGPAT2			UBE2B
AGPAT1			USP15
AGO4			MT1A
AGO1			METTL21B
AEBP2			ETNK1
ADSS			SRPK1
ADORA2B			PHC3
ADNP2			YOD1
ADIPOR1			EPB41L4B
ADCY6			CYLD
ADAM23			STK32A
ADAM10			PPIL4
ACVR2A			MFRP
ACTR3			PGM2L1
ACTR2			SESTD1
ACTG1			HNRNPA2B1
ACTB			ZNF652
ACTB			NMNAT2
ACSL4			RPRD2
ACSL3			NUFIP2
ACP2			SLC20A2
ACP1			SYPL1
ACOX3			CTIF
ACOX1			COLGALT2
ACO1			AP3M1
ACLY			ATP6V1B2
ACBD5			P2RY2
ABL2			ING2
ABI2			M6PR
ABHD17B			SUSD1
ABCF2			APC
ABCF1			EPC1
ABCC5			DYRK2
ABCC3			SCAI
ABCC10			CALM1
ABCB1			TRIM72
ABCA13			CNKSR3
			SUZ12
			DICER1
			RNF213
			NFIC
			KMT2A
			ROCK2
			ARMC8
			ZHX3
			ARHGAP42
			NRARP
			SMS
			ANKRD40
			DDX19B
			SIT1
			PCM1
			ARHGEF39
			BAZ2A
			SRGAP1
			FGF1
			LHFPL4
			NPY4R
			PIAS1
			PELP1
			MRAS
			PHIP
			GRIN1
			PRELP
			SESN2
			STARD9
			LTB
			FASTK
			AC137932.1
			AL391421.1
			DKFZP761J1410
			RUNX1
			UBTD2
			NXPE3
			TIPIN
			TRPM3
			SNX13
			SBNO1
			ESF1
			SRCAP
			CDC6
			CBX2
			PPP1R3F
			GMPPB
			PHF21A
			LIMS1
			TXNDC17
			UBR4
			RAB11FIP1
			POP4
			PPIP5K2
			C17orf85
			PAK2
			STRBP
			CCDC6
			CLPB
			NEK9
			IP6K1
			MMAB
			CYB5R4
			DPH5
			UBE2J1
			FMNL3
			MAP2K6
			DENND4A
			U2SURP
			NUDT5
			PHKG2
			DCAF10
			C6orf57
			NUP37
			IKBKAP
			TPT1
			NCKAP1
			CTNNBL1
			CADM1
			GSK3B
			CDK1
			RPS6KA6
			RMND5B
			UBE2K
			C15orf61
			RS1
			VEZT
			MSH5
			CMC1
			HMGCR
			ZBTB20
			KCNK10
			DCUN1D5
			GPR174
			TNMD
			PKIA
			MALSU1
			RGPD4
			TIMELESS
			RGPD8
			NFAM1
			CSMD1
			PDHB
			PRR11
			KCNK15
			HCFC2
			SGIP1
			ESRP2
			KATNBL1
